# Supplementary material for: Incidence of mortality and its predictors among preterm neonates admitted to neonatal intensive care unit of Adama Hospital Medical College, Adama, Ethiopia. A retrospective follow-up study.
Source: Research Square preprint supplement (doi:10.21203/rs.3.rs-6710199/v1), 2025-07-01
Supplement: Supplementary file 1 [file 1816b0880434a3268ab41057.docx]

# Annex

**English version of Data Abstraction sheet**

This is patient information collection checklists intended incidence of mortality and its predictors among preterm neonates admitted to the NICU of Adama Hospital Medical College.

Data collection Date **--------------**

Data collectors Name __________

Checklist Code ___________

| Code | Variables | Response | Remark |
| --- | --- | --- | --- |
| 001 | Age at admission | ________Days (Hours) |  |
| 002 | Sex | 1. Male  2. Female |  |
| 003 | Residence | 1. Urban  2. rural |  |
| 004 | Type of pregnancy | 1. Singleton  2. Multiple |  |
| 005 | Length of stay in Hospital | _______Days |  |
| 006 | ANC | 1. Yes  2. No |  |
| 007 | Number of ANC follow up | 1. <4  2. >= 4 |  |
| 008 | Maternal Age | _____year |  |
| 009 | Parity | ______ |  |
| 010 | Gravidity | ______ |  |
| 011 | Place of delivery | 1. Institutional delivery  2. Home delivery |  |
| 012 | Weight at birth | ________kg |  |
| 013 | Mode of Delivery | 1. SVD  2. Instrumental  3. C/S |  |
| 014 | Gestational age at birth | ____weeks |  |
| 015 | APGAR score at 5Th minute | 1. 1st minute_________  2. 5th minute_________  3. 10th minute________ |  |
| 016 | Temperature at admission | _______oC |  |
| 017 | Congenital Malformation | 1. Yes  2. No |  |
| 018 | Maternal Medical Problem | 1. preclamsia  2. Eclamsia  3. DM  4. Chronic hypertension  5. APH  6. Other(specify)_____ |  |
| 019 | PROM | 1. Yes  2. No |  |
| 020 | Cord Proplase | 1. Yes  2. No |  |
| 020 | Main neonatal medical problem | 1. RDS  2. Sepsis  3. Hypoglycemia  4. Meningitis  5. IVH  6. Other(Specify)_______ |  |
| 021 | Outcome of neonate | 1. Discharged improved  2. Left against Medical Advice  3. Referred  4. Death |  |
| 022 | Age at discharge | _______days |  |
| 023 | Age at death | ________days |  |
| 026 | Causes of death | 1. RDS  2. NEC  3. Sepsis  4. Apnea prematurity  5.HAI  6. Pulmonary hemorrhage  7. Other (Specify)_________ |  |
